# Supplementary material for: l-Ornithine-l-Aspartate (LOLA) Normalizes Metabolic Parameters in Models of Steatosis, Insulin Resistance and Metabolic Syndrome
Source: MDPI journal article supplement (doi:10.3390/pharmaceutics16040506), 2024-04-07
Supplement: s1 [file s1]

# Supplementary Materials:

## L-Ornithine-L-Aspartate (LOLA) Normalizes Metabolic Parameters in Models of Steatosis, Insulin Resistance and Metabolic Syndrome

Ali Canbay, Oliver Götze, Ozlem Kucukoglu, Sönke Weinert, Roland S. Croner, Theodor Baars, Mustafa K. Özçürümez and Robert K. Gieseler

Table S1. Patient demographics and baseline characteristics.

| Age | Sex    | Height | Weight | BMI   | GPT   | GOT   | GGT   | FFA   | M30     | M65     | CD36  | Steatosis | Ballooning | Lobular Inflamm. | Fibrosis | NAS |
|-----|--------|--------|--------|-------|-------|-------|-------|-------|---------|---------|-------|-----------|------------|------------------|----------|-----|
|     | 1      |        | 172.00 | 46.00 | 62.0  | 39.0  | 50.0  |       | 38.72   | 824.58  | 9.07  | 2         | 2          | 2                | 2        | 6   |
|     | 1      | 188.00 | 152.00 | 43.01 | 34.0  | 23.0  | 34.0  | 22.06 | 118.01  | 185.51  | 4.60  | 3         | 2          | 2                | 2        | 7   |
|     | 0      | 167.00 | 173.00 | 62.03 | 98.0  | 55.0  | 114.0 | 27.40 | 410.66  | 564.07  | 7.23  | 3         | 2          | 3                | 2        | 8   |
|     | 0      | 172.00 | 154.00 | 52.06 | .     | .     | .     | 22.26 | 389.29  | 610.92  | 18.85 | 3         | 2          | 2                | 2        | 7   |
|     | 1      | 190.00 | 142.00 | 39.34 | 165.0 | 120.0 | 265.0 | 20.84 | 511.89  | 736.87  | 43.31 | 3         | 2          | 1                | 2        | 6   |
|     | 1      | 172.00 | 167.00 | 56.45 | .     | .     | .     | 22.06 | 91.56   | 406.57  | 20.59 | 1         | 1          | 2                | 2        | 4   |
| 36  | 1      | 182.00 | 208.40 | 62.92 | 45.0  | 29.0  | 25.0  | 17.76 | 368.32  | 416.22  | 7.80  | 2         | 1          | 2                | 2        | 5   |
| 29  | 0      | 157.00 | 111.00 | 45.03 | 12.0  | 22.0  | 10.0  | 14.84 | 136.40  | 253.52  | 1.99  | 0         | 0          | 1                | 2        | 1   |
| 43  | 0      | 166.00 | 139.00 | 50.44 | 45.0  | 30.0  | 17.0  | 30.34 | 140.93  | 248.27  | 13.57 | 2         | 1          | 2                | 2        | 5   |
| 26  | 0      | 176.00 | 159.00 | 51.33 | 21.0  | 14.0  | 41.0  |       | 185.45  | 260.62  | 4.63  | 1         | 1          | 2                | 2        | 4   |
| 30  | 0      | 159.00 | 157.00 | 62.10 | 31.0  | 23.0  | 18.0  |       | 141.68  | 335.02  | 2.41  | 1         | 0          | 1                | 2        | 2   |
| 37  | 0      | 163.00 | 104.00 | 39.14 | 22.0  | 23.0  | 20.0  |       | 308.57  | 471.17  | 2.81  | 0         | 0          | 1                | 1c       | 1   |
| 59  | 1      | 190.00 | 188.00 | 52.08 | 25.0  | 16.0  | 34.0  |       | 121.04  | 402.80  | 3.82  | 1         | 1          | 2                | 2        | 4   |
| 47  | 0      | 167.00 | 160.00 | 57.37 | 15.0  | 17.0  | 77.0  |       | 364.41  | 519.06  | 6.20  | 1         | 1          | 1                | 2        | 3   |
| 51  | 0      | 171.00 | 160.00 | 54.72 | 34.0  | 31.0  | 25.0  |       | 648.48  | 721.48  | 2.57  | 2         | 1          | 1                | 2        | 4   |
| 32  | F      | 159.00 | 139.00 | 54.98 | 27.0  | 22.0  | 34.0  |       | 120.17  | 260.92  | 13.80 | 0         | 0          | 1                | 2        | 1   |
| 52  | F      | 156.00 | 142.00 | 58.35 | 39.0  | 27.0  | 64.0  |       | 1044.69 | 1123.67 | 1.23  | 2         | 1          | 1                | 2        | 4   |
| 50  | F      | 158.00 | 124.80 | 49.99 | 17.0  | 19.0  | 15.0  |       | 356.16  | 491.69  | 3.12  | 1         | 0          | 1                | 1a       | 2   |
| 54  | M      | 172.00 | 114.00 | 38.53 | 20.0  | 27.0  | 39.0  |       | 746.84  | 909.16  | 2.78  | 0         | 0          | 1                | 2        | 1   |
| 36  | F      | 172.00 | 186.50 | 63.04 | 26.0  | 25.0  | 27.0  |       | 289.63  | 410.57  | 2.10  | 2         | 1          | 3                | 2        | 6   |
| 54  | F      | 164.00 | 125.50 | 46.66 | 13.0  | 17.0  | 24.0  |       | 402.31  | 546.67  | 2.19  | 1         | 0          | 1                | 1a       | 2   |
| 53  | F      | 177.00 | 135.40 | 43.22 | 21.0  | 22.0  | 17.0  |       | 60.23   | 116.61  |       | 1         | 1          | 1                | 2        | 3   |
| 53  | F      | 166.00 | 160.00 | 58.06 | 31.0  | 26.0  | 63.0  |       | 480.26  | 636.75  | 4.79  | 2         | 1          | 1                | 2        | 4   |
| 37  | F      | 165.00 | 141.00 | 51.79 | 27.0  | 25.0  | 25.0  |       | 308.95  | 434.34  | 4.67  | 1         | 0          | 1                | 2        | 2   |
| 36  | F      | 176.00 | 135.00 | 43.58 | 23.0  | 21.0  | 31.0  |       | 1071.77 | 1064.19 | 2.40  | 0         | 0          | 1                | 2        | 1   |
| 59  | F      | 167.00 | 140.00 | 50.20 | 13.0  | 16.0  | 21.0  |       | 418.35  | 565.50  | 3.02  | 1         | 0          | 1                | 1a       | 2   |
| 35  | M      | 170.00 | 144.00 | 49.83 | 34.0  | 22.0  | 38.0  |       | 180.66  | 446.11  | 2.79  | 1         | 1          | 1                | 2        | 3   |
| 61  | F      | 172.00 | 167.00 | 56.45 | 50.0  | 32.0  | 21.0  |       | 212.97  | 315.82  |       | 0         | 0          | 1                | 2        | 1   |
| 43  | F      | 183.00 | 128.00 | 38.22 | 20.0  | 20.0  | 26.0  |       | 177.40  | 253.26  | 5.63  | 1         | 1          | 1                | 2        | 3   |
| 39  | F      | 165.00 | 144.00 | 52.89 | 70.0  | 49.0  | 136.0 |       | 1154.01 | 2669.80 | 0.64  | 2         | 1          | 2                | 2        | 5   |
| 45  | M      | 180.00 | 134.00 | 41.36 | 50.0  | 38.0  | 74.0  | 25.64 | 562.10  | 994.67  |       | 2         | 1          | 1                | 2        | 4   |
| 37  | F      | 169.00 | 132.00 | 46.22 | 46.0  | 58.0  | 34.0  | 23.22 | 674.19  | 1321.48 |       | 3         | 1          | 1                | 2        | 5   |
| 25  | F      | 177.00 | 212.00 | 67.67 | 30.0  | 26.0  | 32.0  | 20.07 | 132.88  | 353.16  |       | 0         | 0          | 1                | 1c       | 1   |
| 64  | F      | 159.00 | 150.00 | 59.33 | 24.0  | 25.0  | 43.0  | 18.17 | 221.57  | 371.00  |       | 2         | 1          | 1                | 2        | 4   |
| 36  | F      | 164.00 | 119.00 | 44.24 | 28.0  | 17.0  | 29.0  | 10.69 | 95.66   | 316.31  |       | 1         | 0          | 1                | 1a       | 2   |
| 63  | F      | 167.00 | 135.00 | 48.41 | 23.0  | 16.0  | 16.0  | 28.99 | 74.50   | 346.60  |       | 1         | 0          | 1                | 2        | 2   |
| 41  | F      | 166.00 | 160.00 | 58.06 | 12.0  | 20.0  | 29.0  | 18.98 | 79.31   | 156.85  |       | 1         | 1          | 3                | 2        | 5   |
| 40  | M      | 177.00 | 152.00 | 48.52 | 51.0  | 35.0  | 44.0  | 32.30 | 289.90  | 900.34  |       | 3         | 1          | 1                | 2        | 5   |
| 24  | F      | 178.00 | 145.00 | 45.76 | 40.0  | 27.0  | 55.0  | 20.50 | 112.50  | 455.63  |       | 0         | 0          | 0 ?              | 2        | 0 ? |
| 44  | F      | 178.00 | 158.00 | 49.87 | 8.0   | 17.0  | 17.0  | 28.54 | 78.89   | 789.13  |       | 1         | 1          | 2                | 2        | 4   |
| 53  | M      | 183.00 | 185.00 | 55.24 | 39.0  | 32.0  | 36.0  | 30.65 | 161.12  | 595.21  |       | 1         | 1          | 3                | 2        | 5   |
| 42  | M      | 187.00 | 162.20 | 46.38 | 102.0 | 50.0  | 52.0  |       | 167.05  | 287.28  |       | 2         | 1          | 3                | 2        | 6   |
| 34  | F      | 176.00 | 142.10 | 45.87 | 56.0  | 52.0  | 27.0  |       | 213.12  | 516.85  |       | 1         | 1          | 1                | 2        | 3   |
| 44  | M      | 189.00 | 184.00 | 51.51 | 14.0  | 21.0  | 29.0  | 23.40 | 164.49  | 412.24  |       | 0         | 0          | 1                | 2        | 1   |
| F   | 167.00 | 143.40 | 51.42  | 36.0  | 27.0  | 25.0  |       |       | 502.51  | 597.42  | 26.43 | 1         | 1          | 1                | 2        | 3   |
| 31  | F      | 180.00 | 148.00 | 45.68 | 24.0  | 23.0  | 52.0  |       | 290.91  | 366.95  | 1.89  | 2         | 1          | 1                | 2        | 4   |
| 65  | F      | 154.00 | 137.20 | 57.85 | 11.0  | 17.0  | 30.0  |       | 228.80  | 334.62  | 1.71  | 1         | 1          | 3                | 2        | 5   |
| 44  | F      | 161.00 | 122.00 | 47.07 | 20.0  | 28.0  | 20.0  |       | 379.11  | 519.17  | 3.10  | 1         | 1          | 1                | 2        | 3   |
| 19  | M      | 172.00 | 180.00 | 60.84 | 48.0  | 23.0  | 72.0  |       | 365.61  | 503.05  | 2.48  | 2         | 1          | 2                | 1a       | 5   |
| 53  | F      | 175.00 | 207.00 | 67.59 | 36.0  | 36.0  | 104.0 |       | 292.92  | 1274.85 | 9.13  | 3         | 1          | 1                | 2        | 5   |
| 26  | F      |        |        |       | 18.0  | 18.0  | 19.0  |       | 219.52  | 254.22  | 1.45  | 0         | 0          | 1                | 2        | 1   |
| 52  | F      | 176.00 | 134.00 | 43.26 | 50.0  | 45.0  | 15.0  |       | 155.95  | 455.97  | 1.73  | 1         | 1          | 2                | 2        | 4   |
| 44  | F      | 178.00 | 132.00 | 41.66 | 18.0  | 20.0  | 18.0  |       | 161.15  | 791.64  |       | 1         | 0          | 1                | 1a       | 2   |
| 33  | F      | 173.00 | 135.00 | 45.11 | 56.0  | 36.0  | 34.0  |       | 351.06  | 794.70  |       | 2         | 1          | 2                | 2        | 5   |
| 45  | F      | 164.00 | 122.70 | 45.62 | 11.0  | 19.0  | 38.0  |       |         |         |       | 1         | 1          | 1                | 2        | 3   |
| 63  | F      | 160.00 | 105.00 | 41.02 | 32.0  | 29.0  | 44.0  | 23.02 | 208.93  | 834.74  |       | 1         | 1          | 1                | 2        | 3   |
| 41  | F      | 180.00 | 145.00 | 44.75 | 16.0  | 16.0  | 22.0  | 14.43 | 128.77  | 269.78  |       | 1         | 1          | 1                | 2        | 3   |
| 36  | F      | 164.00 | 169.00 | 62.83 | 61.0  | 42.0  | 30.0  | 19.54 | 299.16  | 573.64  |       | 2         | 1          | 2                | 2        | 5   |
| 58  | M      | 191.00 | 192.00 | 52.63 | 38.0  | 29.0  | 48.0  | 18.89 | 334.42  | 445.16  |       | 1         | 0          | 1                | 2        | 2   |
| 42  | F      | 162.00 | 135.00 | 51.44 | 17.0  | 20.0  | 18.0  | 23.87 | 305.61  | 406.79  |       | 0         | 0          | 1                | 2        | 1   |
| 41  | F      | 170.00 | 149.00 | 51.56 | 23.0  | 21.0  | 27.0  | 29.38 | 316.21  | 745.71  |       | 1         | 1          | 1                | 1c       | 3   |
| 50  | F      | 169.00 | 121.00 | 42.37 | 41.0  | 27.0  | 24.0  | 22.35 |         |         |       | 1         | 1          | 1                | 2        | 3   |
| 43  | F      | 176.00 | 126.00 | 40.68 | 42.0  | 36.0  | 20.0  | 20.83 | 179.54  | 499.26  |       | 1         | 1          | 1                | 2        | 3   |
| 51  | F      | 165.00 | 180.00 | 66.12 | 18.0  | 20.0  | 37.0  | 24.46 | 86.22   | 333.06  |       | 2         | 1          | 2                | 2        | 5   |
| 28  | F      | 161.00 | 118.00 | 45.52 | 20.0  | 15.0  | 26.0  |       | 132.80  | 371.25  |       | 0         | 0          | 1                | 2        | 1   |
| 34  | F      | 155.00 | 150.00 | 62.43 | 18.0  | 18.0  | 20.0  |       | 122.91  | 248.26  |       | 0         | 0          | 1                | 2        | 1   |
| 32  | F      | 180.00 | 178.00 | 54.94 | 24.0  | 23.0  | 47.0  |       |         |         |       | 1         | 2          | 1                | 2        | 4   |

|    |   |        |        |       |       |      |       |         |         |   |   |   |    |   |
|----|---|--------|--------|-------|-------|------|-------|---------|---------|---|---|---|----|---|
| 38 | F | 161.00 | 150.00 | 57.87 | 18.0  | 19.0 | 37.0  |         |         | 1 | 1 | 2 | 2  | 4 |
| 46 | F | 168.00 | 153.00 | 54.21 | 19.0  | 22.0 | 20.0  |         |         | 1 | 1 | 1 | 1a | 3 |
| 50 | M | 178.00 | 220.00 | 69.44 | 30.0  | 26.0 | 41.0  | 558.52  | 980.33  | 1 | 1 | 1 | 2  | 3 |
| 37 | F | 158.00 | 170.00 | 68.10 | 39.0  | 28.0 | 34.0  | 112.50  | 455.63  | 1 | 1 | 1 | 2  | 3 |
| 24 | F | 180.00 | 131.00 | 40.43 | 33.0  | 23.0 | 28.0  | 186.36  | 430.58  | 1 | 2 | 2 | 2  | 5 |
| 46 | F | 167    | 192    | 68.84 | 26.0  | 22.0 | 20.0  | 200.44  | 1013.23 | 2 | 2 | 2 | 2  | 6 |
| 54 | F | 156    | 106    | 43.56 | 17.0  | 21.0 | 33.0  | 168.53  | 507.68  | 1 | 1 | 1 | 2  | 3 |
| 46 | M | 176    | 150    | 48.42 | 31.0  | 30.0 | 37.0  | 347.16  | 822.61  | 1 | 1 | 2 | 2  | 4 |
|    | F | 174    | 140    | 46.24 | 13.0  | 20.0 | 17.0  |         |         | 0 | 0 | 1 | 2  | 1 |
| 60 | F | 154    | 130    | 54.82 | 22.0  | 21.0 | 28.0  | 243.41  | 316.11  | 1 | 1 | 1 | 2  | 3 |
| 39 | F | 173    | 178    | 59.47 | 49.0  | 34.0 | 68.0  | 417.57  | 696.70  | 2 | 1 | 1 | 2  | 4 |
| 38 | M | 165.00 | 148.00 | 54.36 | 36.0  | 30.0 | 17.0  | 221.62  |         | 1 | 1 | 1 | 2  | 3 |
| 41 | F | 176.00 | 163.00 | 52.62 | 13.0  | 45.0 | 36.0  | 269.10  | 643.03  | 2 | 2 | 3 | 3  | 7 |
| 37 | M | 200.00 | 177.00 | 44.25 | 37.0  | 26.0 | 23.0  | 178.12  | 1350.04 | 1 | 0 | 1 | 2  | 2 |
| 30 | F | 171    | 189    | 64.64 | 36.0  | 34.0 | 30.0  | 229.02  | 620.48  | 2 | 1 | 2 | 2  | 5 |
| 47 | F | 170    | 126    | 43.60 | 18.0  | 22.0 | 23.0  | 267.47  | 301.02  | 1 | 1 | 3 | 1a | 5 |
| 46 | F | 171.00 | 208.00 | 71.13 | 26.0  | 21.0 | 24.0  | 94.51   | 283.50  | 1 | 1 | 1 | 2  | 3 |
| 52 | F | 164.00 | 157.00 | 58.37 | 51.0  | 31.0 | 42.0  |         | 370.19  | 2 | 1 | 1 | 2  | 4 |
| 60 | F | 178    | 182    | 57.44 | 27.0  | 23.0 | 30.0  |         |         | 1 | 1 | 1 | 2  | 3 |
| 38 | F | 160    | 115    | 44.92 | 19.0  | 22.0 | 70.0  |         |         | 1 | 1 | 1 | 2  | 3 |
| 47 | F | 175    | 143    | 46.69 | 31.0  | 29.0 | 17.0  |         | 186.79  | 1 | 1 | 1 | 2  | 3 |
| 35 | F | 162    | 120    | 45.72 | 42.0  | 29.0 | 17.0  |         | 342.34  | 1 | 1 | 1 | 2  | 3 |
| 35 | F | 170.00 | 161.00 | 55.71 | 22.0  | 40.0 | 21.0  | 102.02  | 216.84  | 1 | 0 | 1 | 2  | 2 |
| 44 | F | 174.00 | 191.00 | 63.09 | 22.0  | 25.0 | 64.0  | 196.37  | 355.07  | 1 | 1 | 2 | 1a | 4 |
| 43 | F | 160.00 | 142.00 | 55.47 | 16.0  | 19.0 | 34.0  | 232.13  | 240.54  | 1 | 1 | 1 | 2  | 3 |
| 45 | F | 168.00 | 180.00 | 63.78 | 15.0  | 20.0 | 27.0  | 380.92  | 521.25  | 2 | 1 | 1 | 2  | 4 |
| 56 | F |        |        |       |       |      |       | 727.72  | 1462.56 | 2 | 1 | 2 | 2  | 5 |
| 33 | F | 175.00 | 171.00 | 55.84 | 47.0  | 37.0 | 18.0  | 266.63  | 874.81  | 1 | 1 | 1 | 2  | 3 |
| 29 | F | 174.00 | 165.00 | 54.50 | 26.0  | 23.0 | 21.0  | 106.70  | 254.09  | 1 | 1 | 1 | 2  | 3 |
| 51 | F | 172.00 | 125.00 | 42.25 | 15.0  | 20.0 | 24.0  | 86.20   | 176.99  | 1 | 1 | 1 | 2  | 3 |
| 27 | F | 170.00 | 156.00 | 53.98 | 20.0  | 24.0 | 22.0  | 326.90  | 326.72  | 0 | 0 | 1 | 2  | 1 |
| 39 | M | 183.00 | 154.00 | 45.99 | 45.0  | 28.0 | 67.0  | 112.07  | 370.86  | 2 | 1 | 2 | 1b | 5 |
| 27 | F | 169.00 | 128.00 | 44.82 | 27.0  | 18.0 | 48.0  | 366.11  | 935.15  | 1 | 1 | 1 | 2  | 3 |
| 40 | F | 163.00 | 125.00 | 47.05 | 74.0  | 50.0 | 132.0 |         | 1956.85 | 3 | 1 | 3 | 1b | 7 |
| 39 | F | 178.00 | 177.00 | 55.86 | 47.0  | 40.0 | 31.0  | 315.77  | 358.49  | 1 | 1 | 1 | 1a | 3 |
| 30 | F | 162.00 | 142.00 | 54.11 | 21.0  | 22.0 | 20.0  | 95.88   | 1176.46 | 1 | 0 | 1 | 1b | 2 |
| 41 | F | 164.00 | 173.00 | 64.32 | 29.0  | 26.0 | 10.0  | 104.54  | 680.97  | 2 | 1 | 1 | 1a | 4 |
| 44 | F | 177.00 | 188.00 | 60.01 | 16.0  | 17.0 | 33.0  | 140.54  | 686.26  | 1 | 1 | 3 | 1b | 5 |
| 45 | F | 167.00 | 163.00 | 58.45 | 27.0  | 22.0 | 22.0  | 325.39  | 1950.69 | 2 | 1 | 3 | 2  | 6 |
| 49 | M | 188.00 | 206.00 | 58.28 | 107.0 | 69.0 | 82.0  | 1105.62 | 2456.71 | 3 | 1 | 2 | 2  | 6 |
| 56 | F | 165.00 | 161.00 | 59.14 | 45.0  | 33.0 | 49.0  | 557.34  | 763.35  | 1 | 1 | 1 | 2  | 3 |
| 35 | F | 172.00 | 172.00 | 58.14 | 15.0  | 21.0 | 30.0  | 126.07  | 153.32  | 1 | 1 | 1 | 2  | 3 |
| 51 | F | 178.00 | 162.00 | 51.13 | 63.0  | 46.0 | 45.0  | 868.67  | 2755.26 | 2 | 1 | 1 | 2  | 4 |
| 40 | F | 175.00 | 164.00 | 53.55 | 18.0  | 21.0 | 33.0  | 120.69  | 234.44  | 1 | 0 | 1 | 2  | 2 |
| 22 | F | 168.00 | 126.00 | 44.64 | 58.0  | 33.0 | 41.0  | 283.73  | 704.54  | 2 | 1 | 1 | 2  | 4 |
| 37 | F | 180.00 | 154.00 | 47.53 | 27.0  | 26.0 | 13.0  |         |         | 0 | 0 | 1 | 2  | 1 |
| 30 | F | 178.00 | 180.00 | 56.81 | 21.0  | 22.0 | 20.0  |         |         | 2 | 1 | 2 | 2  | 5 |
| 42 | F | 169.00 | 119.00 | 41.67 | 20.0  | 21.0 | 18.0  |         | 234.82  | 1 | 1 | 3 | 2  | 5 |
| 44 | M | 180.00 | 172.00 | 53.09 | 48.0  | 35.0 | 46.0  |         |         | 3 | 1 | 1 | 2  | 5 |
| 59 | F | 165.00 | 172.00 | 63.18 | 6.0   | 21.0 | 24.0  |         | 483.37  | 1 | 0 | 1 | 2  | 2 |
| 44 | F | 167.00 | 113.00 | 40.52 | 24.0  | 21.0 | 20.0  | 1309.39 | 2349.57 | 2 | 1 | 1 | 2  | 4 |
| 43 | F | 168.00 | 156.00 | 55.27 | 41.0  | 27.0 | 25.0  | 1182.89 | 1339.92 | 1 | 0 | 1 | 2  | 2 |
| 28 | M | 175.00 | 147.00 | 48.00 | 53.0  | 32.0 | 28.0  | 947.62  | 2971.51 | 2 | 2 | 2 | 2  | 6 |
| 38 | F | 168.00 | 158.00 | 55.98 | 30.0  | 29.0 | 40.0  |         |         | 1 | 1 | 1 | 1a | 3 |
| 60 | F | 162.00 | 118.00 | 44.96 | 23.0  | 24.0 | 60.0  |         |         | 1 | 1 | 1 | 2  | 3 |
| 34 | F | 165.00 | 165.00 | 60.61 | 8.0   | 21.0 | 16.0  |         |         | 1 | 0 | 1 | 2  | 2 |
| 53 | F | 168.00 | 125.00 | 44.29 | 33.0  | 22.0 | 31.0  |         |         | 3 | 1 | 2 | 2  | 6 |
| 52 | F | 165.00 | 109.00 | 40.04 | 44.0  | 31.0 | 56.0  |         |         | 3 | 1 | 3 | 2  | 7 |
| 27 | F | 195.00 | 260.00 | 68.38 | 8.0   | 16.0 | 51.0  |         |         | 1 | 0 | 2 | 2  | 3 |
| 31 | F | 160.00 | 107.00 | 41.80 | 38.0  | 31.0 | 25.0  |         |         | 1 | 0 | 1 | 2  | 2 |
| 51 | F | 158.00 | 130.00 | 52.07 | 51.0  | 41.0 | 42.0  |         |         | 2 | 1 | 3 | 2  | 6 |
| 35 | F | 165.00 | 111.00 | 40.77 | 111.0 | 70.0 | 112.0 |         |         | 2 | 1 | 2 | 2  | 5 |
| 31 | F | 163.00 | 170.00 | 63.98 | 28.0  | 25.0 | 30.0  | 269.80  | 416.55  | 1 | 0 | 1 | 2  | 2 |
| 45 | F | 170.00 | 200.00 | 69.20 | 22.0  | 23.0 | 23.0  | 180.39  | 438.01  | 1 | 1 | 2 | 2  | 4 |
| 50 | M | 181.00 | 126.00 | 38.46 | 49.0  | 42.0 | 86.0  | 441.37  | 956.84  | 2 | 1 | 2 | 2  | 5 |
| 39 | M | 194.00 | 248.00 | 65.89 | 34.0  | 23.0 | 36.0  | 103.85  | 319.56  | 2 | 1 | 3 | 2  | 6 |
| 36 | F | 173.00 | 143.00 | 47.78 | 28.0  | 19.0 | 21.0  | 145.93  | 245.26  | 1 | 0 | 2 | 2  | 3 |
| 45 | F | 168.00 | 130.00 | 46.06 | 33.0  | 25.0 | 39.0  | 218.24  | 436.07  | 1 | 0 | 1 | 2  | 2 |
| 37 | F |        | 117    | 49    | 15.0  | 17.0 | 20.0  |         |         | 0 | 0 | 1 | 1a | 1 |
| 50 | F |        | 157    | 50    | 27.0  | 22.0 | 96.0  |         |         | 1 | 0 | 1 | 2  | 2 |
| 46 | F |        | 174    | 59.5  | 18.0  | 20.0 | 20.0  |         |         | 1 | 1 | 1 | 2  | 3 |
| 30 | F |        | 106    | 37.5  | 41.0  | 65.0 | 27.0  |         |         | 2 | 1 | 1 | 2  | 4 |
| 43 | F |        | 222    | 79    | 16.0  | 21.0 | 21.0  |         |         | 1 | 0 | 2 | 1a | 3 |
| 56 | F |        | 188.4  | 65    | 24.0  | 23.0 | 21.0  | 138.58  | 170.75  | 1 | 2 | 2 | 2  | 5 |
| 41 | F |        | 123    | 43    | 27.0  | 21.0 | 34.0  | 869.55  | 1275.66 | 2 | 2 | 2 | 2  | 6 |
| 38 | F |        | 128    | 43.5  | 34.0  | 28.0 | 22.0  | 110.80  | 110.89  | 1 | 1 | 1 | 0  | 3 |
| 43 | F |        | 186.8  | 63    | 30.0  | 28.0 | 14.0  | 144.12  | 229.66  | 2 | 1 | 1 | 2  | 4 |
| 39 | F |        | 166    | 56    | 18.0  | 24.0 | 37.0  | 425.67  | 330.96  | 2 | 1 | 0 | 2  | 3 |
| 52 | F |        | 123    | 44    | 32.0  | 59.0 | 226.0 | 569.85  | 849.16  | 2 | 2 | 1 | 4  | 5 |
| 38 | F |        | 147.6  | 52    | 24.0  | 17.0 | 13.0  | 284.90  | 1494.25 | 3 | 2 | 2 | 1c | 7 |
| 53 | F | 163    | 114.2  | 43.0  | 31.0  | 24.0 | 71.0  |         |         | 3 | 2 | 1 | 2  | 6 |
| 40 | M | 185    | 186    | 54.0  | 86.0  | 50.0 | 28.0  |         |         | 1 | 1 | 0 | 2  | 2 |
| 58 | F | 178    | 142    | 45.0  | 28.0  | 22.0 | 27.0  |         |         | 2 | 2 | 0 | 1c | 4 |
| 30 | F | 163    | 147    | 55.0  | 14.0  | 15.0 | 13.0  |         |         | 0 | 0 | 1 | 1c | 1 |
| 61 | F | 168    | 148    | 52.0  | 15.0  | 23.0 | 46.0  |         |         | 0 | 1 | 0 | 2  | 1 |
| 43 | M | 181    | 141    | 43.0  | 27.0  | 20.0 | 30.0  |         |         | 1 | 1 | 0 | 3  | 2 |
| 41 | M | 170    | 140    | 48.0  | 78.0  | 41.0 | 79.0  |         |         | 3 | 2 | 1 | 2  | 6 |
| 47 | F |        |        | 47.0  | 14.0  | 20.0 | 13.0  |         |         | 0 | 2 | 2 | 2  | 4 |
| 60 | F | 177    | 137    | 44.0  | 17.0  | 24.0 | 24.0  |         |         | 1 | 2 | 2 | 2  | 5 |

|    |   |     |        |       |       |       |       |   |   |   |    |   |
|----|---|-----|--------|-------|-------|-------|-------|---|---|---|----|---|
| 27 | F | 177 | 153    | 48.0  | 62.0  | 55.0  | 47.0  | 3 | 0 | 1 | 2  | 4 |
| 54 | M | 186 | 196    | 56.0  | 42.0  | 29.0  | 36.0  | 3 | 1 | 0 | 2  | 4 |
| 34 |   | 176 | 152    | 49.0  | 141.0 | 92.0  | 236.0 | 3 | 1 | 1 | 3  | 5 |
| 51 | M | 174 | 144.00 | 46.00 | 33.00 | 23.00 | 37.00 | 3 | 2 | 3 | 3  | 8 |
| 50 | F | 178 | 197    | 62    | 19    | /     | 35    | 2 | 1 | 1 | 2  | 4 |
| 31 | M | 189 | 169    | 47    | 48    | 23    | 35    | 2 | 2 | 1 | 2  | 5 |
| 43 | F | 167 | 148    | 53    | 20    | /     | 16    | 3 | 2 | 2 | 2  | 7 |
| 38 | F | 165 | 156    | 57    | 12    | /     | 16    |   |   |   |    |   |
| 51 | F | 168 | 148    | 52    | 39    | 32    | 47    | 1 | 2 | 2 | 3  | 5 |
| 25 | M | /   | /      | /     | 30    | /     | 72    | 0 | 0 | 1 | 3  | 1 |
| 50 | F | 168 | 111.6  | 39.5  | 101   | 50    | 99    | 0 | 1 | 1 | 2  | 2 |
| 54 | F | 160 | 158    | 62    | 27    | /     | 32    | 0 | 2 | 1 | 2  | 3 |
| 33 | F | 169 | 106.8  | 37.4  | 51    | 23    | 83    | 2 | 2 | 0 | 3  | 4 |
| 34 | F | 169 | 118    | 41    | 15    | /     | 14    | 0 | 0 | 0 | 2  | 0 |
| 50 | M | 195 | 179    | 47    | 31    | /     | 21    | 0 | 0 | 1 | 2  | 1 |
| 41 | F | 172 | 150    | 50.7  | 36    | 32    | 13    | 0 | 0 | 0 | 1C | 0 |
| 38 | F | 170 | 121    | 42    | 34    | /     | 16    | 0 | 2 | 1 | 3  | 3 |
| 46 | F | 168 | 123    | 43.6  | 124   | 102   | 165   | 2 | 2 | 3 | 3  | 7 |
| 51 | F | 185 | 147    | 43    | 24    | /     | 13    | 1 | 2 | 1 | 3  | 4 |
| 63 | F | 171 | 140    | 47.8  | 18    | /     | 28    | 1 | 1 | 1 | 1A | 3 |
| 62 | F | 165 | 135    | 49.6  | 19    | /     | 31    | 3 | 2 | 1 | 3  | 6 |
| 49 | F | 168 | 112    | 40    | 18    | /     | 21    | 1 | 1 | 2 | 1C | 4 |
| 44 | M | 180 | 206.6  | 63.8  | 36    | /     | 33    | 2 | 1 | 2 | 4  | 5 |
| 45 | F | 171 | 145.3  | 49.7  | 29    | /     | 15    | 1 | 1 | 1 | 2  | 3 |
| 42 | F | 175 | 180    | 58.9  | 37    | 33    | 47    | 1 | 1 | 2 | 2  | 4 |
| 40 | F | 170 | 157.7  | 54.6  | 18    | /     | 31    | 1 | 2 | 2 | 2  | 5 |
| 27 | F | 172 | 149.2  | 50.4  | 45    | 29    | 35    | 3 | 2 | 2 | 1A | 7 |
| 50 | F | 172 | 130    | 45    | 36    | 27    | 74    | 3 | 2 | 3 | 1C | 8 |
| 25 | F | 173 | 162.3  | 54.2  | 23    | /     | 32    | 0 | 1 | 2 | 2  | 3 |
| 43 | F | 166 | 143.5  | 43.7  | 21    | /     | 10    | 0 | 1 | 1 | 1C | 2 |
| 44 | M | 183 | 146    | 42.7  | 8     | /     | 15    | 1 | 2 | 1 | 2  | 4 |
| 53 | F | 170 | 128    | 44.5  | 15    | /     | 18    | 0 | 1 | 1 | 1C | 2 |
| 50 | F | 166 | 123    | 44.7  | 35    | /     | 61    | 0 | 1 | 1 | 2  | 2 |
| 34 | F | 166 | 166    | 59    | 21    | /     | 13    | 3 | 2 | 3 | 2  | 8 |
| 53 | M | 185 | 155    | 45.3  | 120   | 79    | 109   | 3 | 1 | 2 | 2  | 6 |
| 44 | F | 170 | 153    | 52.9  | 24    | /     | 14    | 1 | 2 | 2 | 2  | 5 |

**Table S2.** Antigens, primary anti-human antibodies (top) and secondary conjugated antibodies (bottom). Target antigens are listed in alphabetical order (except for Greek letters).

### 1. Primary Anti-Human Antibodies

| Antigen           | Type | Host | Clone  | Class | Conjugate | IB | IHC | Context                                                                          | Vendor | Catalog No. |
|-------------------|------|------|--------|-------|-----------|----|-----|----------------------------------------------------------------------------------|--------|-------------|
| ACC1*             | mAb  | R    | C83B10 | IgG   | –         | +  | –   | Gluconeogenesis + <i>de-novo</i> lipogenesis                                     | CS     | 3676        |
| β-Actin           | mAb  | M    | AC-15  | IgG   | –         | +  | –   | Microfilament protein                                                            | SA     | A1978       |
| AIF               | mAb  | R    | D39D2  | IgG   | –         | +  | –   | Apoptosis-inducing factor + caspase-independent apoptosis                        | CS     | 5318        |
| AKT               | pAb  | R    | –      | IgG   | –         | +  | –   | Gluconeogenesis                                                                  | CS     | 9272        |
| AMPK-α            | mAb  | R    | D5A2   | IgG   | –         | +  | –   | Master regulator of energy metabolism, homeostasis, lipogenesis, gluconeogenesis | CS     | 5831        |
| Arginase1         | mAb  | R    | D4E3M  | IgG   | –         |    | +   | Urea cycle                                                                       |        |             |
| Bax               | pAb  | R    | –      | IgG   | –         | +  | –   | Apoptosis through mitochondrial stress                                           | CS     | 2772        |
| BCAT2             | mAb  | R    | D8K3O  | IgG   | –         | +  | –   | BCAA metabolism                                                                  | CS     | 79764       |
| β-Catenin         | mAb  | R    | D10A8  | IgG   | –         | +  | –   | EMT/WNT signaling                                                                | CS     | 8480        |
| CD36              | pAb  | R    | –      | IgG   | –         | +  | –   | Fatty acid transporter                                                           | NB     | NB400-144   |
| CD73              | mAb  | R    | D7F9A  | IgG   | –         | +  | –   | AMP to adenosine-converting enzyme                                               | CS     | 13160       |
| Citrate synthase  | mAb  | R    | D7V8B  | IgG   | –         | +  | –   | Mitochondrial enzyme (TCA cycle)                                                 | CS     | 14309       |
| Cleaved caspase 3 | pAb  | R    | –      | IgG   | –         | +  | –   | Apoptosis                                                                        | CS     | 9661        |
| CP51              | pAb  | R    | –      | IgG   | –         | +  | +   | Urea cycle                                                                       | NB     | NBP1-86019  |

|                  |     |   |        |                  |   |   |   |                                                                                                                                     |       |            |
|------------------|-----|---|--------|------------------|---|---|---|-------------------------------------------------------------------------------------------------------------------------------------|-------|------------|
| E-Cadherin       | mAb | M | 36/E   | IgG              | – | + | – | Carcinogenesis (EMT) and zonation                                                                                                   | BD    | 610182     |
| FASN             | mAb | R | C20G5  | IgG              | – | + | – | <i>De-novo</i> lipogenesis                                                                                                          | CS    | 3180       |
| GAPDH            | mAb | R | 14C10  | IgG              | – | + | – | Energy metabolism                                                                                                                   | CS    | 2118       |
| GLUL             | mAb | R | D2O3F  | IgG              | – | + | – | NH <sub>3</sub> homeostasis                                                                                                         | CS    | 80636      |
| HSP27            | mAb | M | G31    | IgG <sub>i</sub> | – | + | – | Mainly cytosolic, but also in other organelles, except mitochondria; inhibits apoptosis, among other functions                      | CS    | 2402       |
| HSP60            | mAb | R | D6F1   | IgG              | – | + | – | Mitochondrial protein import and macro-molecular assembly                                                                           | CS    | 12165      |
| OTC              | pAb | R | –      | IgG              | – | + | + | Urea cycle                                                                                                                          | NB    | NBP1-87408 |
| p21              | mAb | R | 12D1   | IgG              | – | + | – | Tumor suppressor, inhibitor of cell cycle progression                                                                               | CS    | 2947       |
| p-AKT            | mAb | R | 193H12 | IgG              | – | + | – | Gluconeogenesis                                                                                                                     | CS    | 4058       |
| p-AMPK- $\alpha$ | mAb | R | 40H9   | IgG              | – | – | – | Master regulator of energy metabolism, homeostasis, lipogenesis, gluconeogenesis                                                    | CS    | 2535       |
| PARP             | pAb | R | –      | IgG              | – | + | – | Enzyme involved in transcriptional regulation, DNA repair, cell death, inflammation                                                 | CS    | 9542       |
| PHB1             | pAb | R | –      | IgG              | – | + | – | Mitochondrial chaperone acting as a tumor suppressor, and involved in homeostasis, cell cycle control, proliferation, and apoptosis | CS    | 2426       |
| PPAR- $\gamma$   | mAb | R | C26H12 | IgG              | – | + | – | <i>De-novo</i> lipogenesis                                                                                                          | CS    | 2435       |
| p-PTEN           | mAb | R | 44A7   | IgG              | – | + | – | Tumor suppressor                                                                                                                    | CS    | 9549       |
| PTEN             | mAb | R | 138G6  | IgG              | – | + | – | Tumor suppressor                                                                                                                    | CS    | 9559       |
| Slug-Snail       | pAb | R | –      | IgG              | – | + | – | Carcinogenesis (EMT)                                                                                                                | abcam | Ab180714   |
| SOD1             | mAb | M | 71G8   | IgG              | – | + | – | Antioxidant                                                                                                                         | CS    | 4266       |

## 2. Secondary Conjugated Antibodies

| Antigen    | Type | Host | Clone | Class | Conjugate | ICC | IHC | Application                          | Vendor | Catalog No. |
|------------|------|------|-------|-------|-----------|-----|-----|--------------------------------------|--------|-------------|
| Mouse IgG  | N/A  | H    | N/A   | N/A   | HRP       | +   | +   | Visualizing bound primary murine IgG | CS     | 7076        |
| Rabbit IgG | N/A  | H    | N/A   | N/A   | HRP       | +   | +   | Visualizing bound primary rabbit IgG | CS     | 7074        |

\* Abbreviations: ACC1, acetyl-CoA carboxylase 1; AIF, apoptosis-inducing factor; AKT, PI-3'K, phosphoinositide 3-kinase; AMPK- $\alpha$ , AMP-activated protein kinase  $\alpha$ ; Bax, BCL2-associated X protein; BCAT2, branched-chain amino acid aminotransferase 2; BD, Becton Dickinson, Heidelberg, Germany; CD36/FAT, fatty acid translocase; CD73, ecto-5'-nucleotidase (AMP-to-adenosine converting enzyme); CS, Cell Signaling Technology Europe, Frankfurt/Main, Germany; CPS1, carbamoyl phosphate synthetase 1; EMT, epithelial-mesenchymal transition; FASN, fatty acid synthase; GAPDH, glyceraldehyde-3-phosphate dehydrogenase; GLUL, glutamate-ammonia ligase (obsolete: glutamine synthetase); H, horse; HRP, horseradish peroxidase; HSP27, heat shock protein 27; HSP60, heat shock protein 60; IB, immunoblotting; IHC, immunohistochemistry; M, mouse; mAb, monoclonal antibody; N/A, not available; NB, Novus Biologicals, Centennial, CO, USA via Bio-Techne, Wiesbaden-Nordendstadt, Germany; OTC, ornithine transcarbamylase; p21, a tumor suppressor; pAb, polyclonal antibody; pAKT, phosphorylated AKT; pAMPK- $\alpha$ /AMPK- $\alpha$ , ratio of phosphorylated AMPK- $\alpha$  to non-phosphorylated AMPK- $\alpha$ ; PARP, poly ADP ribose polymerase; PPAR $\alpha$ , peroxisome proliferator-activated receptor  $\alpha$ ; p-PTEN,

phosphorylated phosphatase and tensin homolog; R, rabbit, SA, Sigma-Aldrich (formerly) / now: Merck, Darmstadt, Germany; Slug, a key EMT regulator; Snail 2, a key EMT regulator; SOD1, superoxide dismutase 1; TCA, tricarboxylic acid.

**Table S3.** Primer oligonucleotide sequences for qRT-PCR in alphabetical order of their transcript-related specificities. Transcripts are listed in alphabetical order. See footer for abbreviations.

| Transcript                | Primer Sequence                                                                    | Context                                                                                                                               | Vendor | Catalog No. |
|---------------------------|------------------------------------------------------------------------------------|---------------------------------------------------------------------------------------------------------------------------------------|--------|-------------|
| <i>bcat2</i>              | Not available                                                                      | BCAA metabolism                                                                                                                       | Q      | QT00077406  |
| <i>bckdha</i>             | Not available                                                                      | BCAA metabolism                                                                                                                       | Q      | QT00057988  |
| <i>bckdk</i>              | Not available                                                                      | BCAA metabolism                                                                                                                       | Q      | QT00088389  |
| <i>cd36</i>               | Forward: 5'-AACAGTTCTCTCAAAGTTCTGACTTG-3'<br>Reverse: 5'-AACAGAGGCTGACAACTTCACA-3' | Fatty acid transporter                                                                                                                | EG     | N/A         |
| <i>cd73</i>               | Forward: 5'-CTCCTCTCAATCATGCCGCT-3'<br>Reverse: 5'-CAAATGTGCCTCCAAAGGGC-3'         | Carcinogenesis (EMT) and zonation                                                                                                     | EG     | N/A         |
| <i>cpt1</i>               | Forward: 5'-TGTGCTGGATGGTGTCTGTC-3'<br>Reverse: 5'-CAAACCTGGACCGGGAGGAAA-3'        | Energy metabolism                                                                                                                     | EG     | N/A         |
| <i>fasn</i>               | Forward: 5'-GATGCGGGAATACAGGTGAC-3'<br>Reverse: 5'-GACACTGCCGTGGAGAACAT-3'         | De-novo lipogenesis                                                                                                                   | EG     | N/A         |
| <i>foxo1</i>              | Forward: 5'-TTATGACCGAACAGGATGATCTTG-3'<br>Reverse: 5'-TGTTGGTGATGAGAGAAGGTTGAG-3' | Insulin-dependent gluconeogenesis                                                                                                     | EG     | N/A         |
| <i>gadph</i>              | Forward: 5'-GGTGACCAGGCGCCCAATACG-3'<br>Reverse: 5'-TTCTTTTGCCTCGCCAGCCGA-3'       | Household enzyme and, <i>inter alia</i> , energy metabolism, glycolysis enzyme, transcription activation, and initiation of apoptosis | EG     | N/A         |
| <i>hmf4</i>               | Forward: 5'-CGCACTGCCGGCTAAATCTGC-3'<br>Reverse: 5'-CGACACGTCCCCATCAGAAGGC-3'      |                                                                                                                                       | EG     | N/A         |
| <i>hprt</i>               | Forward: 5'-GACCAGTCAACAGGGGACAT-3'<br>Reverse: 5'-CTTGCGACCTTGACCATCTT-3'         | Household enzyme                                                                                                                      | EG     | N/A         |
| <i>ikk-β</i>              | Forward: 5'-TGTCACAGGGTAGGTGTGGA-3'<br>Reverse: 5'-AAGGCCCTGGATGACATCTT-3'         | Inflammation                                                                                                                          | EG     | N/A         |
| <i>il-6</i>               | Forward: 5'-TTTCACCAGGCAAGTCTCCT-3'<br>Reverse: 5'-AGGCACTGGCAGAAAACAAC-3'         | Inflammation                                                                                                                          | EG     | N/A         |
| <i>p21<sup>Cip1</sup></i> | Forward: 5'-GACTCTCAGGTCGAAAACG-3'<br>Reverse: 5'-GGATTAGGGCTTCTCTTGG-3'           | Tumor suppressor, inhibitor of cell cycle progression                                                                                 | EG     | N/A         |
| <i>p53</i>                | Forward: 5'-GCGCACAGAGGAAGAGAATCTCCG-3'<br>Reverse: 5'-TTTGGCTGGGGAGAGGAGCTG-3'    | Tumor suppressor, involved in carcinogenesis (EMT) and zonation                                                                       | EG     | N/A         |
| <i>pgca</i>               | Forward: 5'-CAGCACACTGCTGCTCGTAATA-3'<br>Reverse: 5'-AGCTTTGCCTACATGGCAGC-3'       | Energy metabolism, insulin-dependent gluconeogenesis, fatty acid β-oxidation                                                          | EG     | N/A         |
| <i>ppara</i>              | Forward: 5'-ACTCCACCTGCAGAGCAACCA-3'<br>Reverse: 5'-TAGATCTCCTGCAGTAGCGGG-3'       | Lipogenesis, fatty acid β-oxidation                                                                                                   | EG     | N/A         |
| <i>pten</i>               | Forward: 5'-GAACTGGCAGGTAGAAGGCA-3'<br>Reverse: 5'-CATAACGATGGCTGTGGTTG-3'         | Carcinogenesis (EMT) and zonation                                                                                                     | EG     | N/A         |
| <i>scd</i>                | Not available                                                                      | De-novo lipogenesis                                                                                                                   | Q      | QT00052381  |
| <i>sdha</i>               | Forward: 5'-CAAAGGGCTTCTTCTGTTGC-3'<br>Reverse: 5'-ACACAGACCTGGTGGAGACC-3'         | Participates in TCA cycle and electron transport chain (household enzyme)                                                             | EG     | N/A         |

|                                |                                                                               |                                                                                                    |    |     |
|--------------------------------|-------------------------------------------------------------------------------|----------------------------------------------------------------------------------------------------|----|-----|
| <i>sirt1</i>                   | Forward: 5'-AACGATTGGTGGCAAAAC-3'<br>Reverse: 5'-CAGTGGCTGGAACAGTGAGA-3'      | <i>De-novo</i> lipogenesis, fatty acid<br>$\beta$ -oxidation, insulin-dependent<br>gluconeogenesis | EG | N/A |
| <i>smile</i>                   | Forward: 5'-AAAAGAGGCGGAGAAAGTCC-3'<br>Reverse: 5'-CTCTGAAGAGCGAGGTGGTC-3'    | <i>De-novo</i> lipogenesis                                                                         | EG | N/A |
| <i>srebp-1c</i>                | Forward: 5'-CTGACCGACATCGAAGGTGA-3'<br>Reverse: 5'-GAAAGTGCAATCCATGGCTCC-3    | <i>De-novo</i> lipogenesis,<br>gluconeogenesis                                                     | EG | N/A |
| <i>tnf-<math>\alpha</math></i> | Forward: 5'-GAGCTCCACGCCATTGGCCA-3'<br>Reverse: 5'-GCCCCAGAGGGAAGAGTTCCTCC-3' | Inflammation                                                                                       | EG | N/A |

\* Abbreviations: BCAT2, branched-chain amino acid aminotransferase 2; BCKDHA, branched-chain keto acid dehydrogenase; BCKDK, branched-chain keto acid dehydrogenase kinase; CD36, fatty acid translocase; CD73, ecto-5'-nucleotidase (AMP-to-adenosine converting enzyme); CPT1, carnitine palmitoyltransferase 1; EG, Eurofins Genomics, Ebersberg, Germany; FASN, fatty acid synthase; FOXO1, forkhead box protein O1; GAPDH, glyceraldehyde-3-phosphate dehydrogenase; HNF4, hepatocyte nuclear factor 4; HPRT, hypoxanthine phosphoribosyl transferase 1; IKK- $\beta$ , I $\kappa$ B kinase- $\beta$  (part of the IKK kinase complex, i.e., the core element of the NF- $\kappa$ B cascade); IL-6, interleukin 6, p21Cip1, a tumor suppressor; p53, a tumor suppressor; PGC1 $\alpha$ , peroxisome proliferator-activated receptor  $\gamma$  coactivator 1- $\alpha$ ; PPAR $\alpha$ , peroxisome proliferator-activated receptor  $\alpha$ ; PTEN, phosphatase and tensin homolog; Q, Qiagen, Hilden, Germany. SCD1, stearyl-CoA desaturase; SDHA, succinate dehydrogenase complex, subunit A; SIRT1, for short: sirtuin 1 (sirtuin silent information regulator 1); SMILE, small heterodimer partner interacting leucine zipper protein; srbf1, besides other isotypes also encoding for the hepatic isoform, SREBP-1c, sterol regulatory element-binding protein-1c; TNF- $\alpha$ , tumor necrosis factor  $\alpha$ ; TCA, tricarboxylic acid.
